# Supplementary material for: Insight into the Burden of Malignant Respiratory Tumors and their Relationship with Smoking Rates and Lead Contamination in Mexico
Source: MDPI journal article supplement (doi:10.3390/toxics10110708), 2022-11-20
Supplement: s1 [file s1]

## Supplementary data

**Supplementary data S1.** DALYs rate due to malignant respiratory tumors, the prevalence of daily smokers, and lead contamination, Mexico 2019

| Location ID | DALYs rate<br>(per 100,000) | State                           | Lead dust<br>(tons/year) | Daily smokers<br>(prevalence) |
|-------------|-----------------------------|---------------------------------|--------------------------|-------------------------------|
| 4643        | 181.4                       | Aguascalientes                  | -                        | 0.102                         |
| 4644        | 214.1                       | Baja California                 | 1.423                    | 0.080                         |
| 4645        | 256.6                       | Baja California Sur             | -                        | 0.076                         |
| 4646        | 140.5                       | Campeche                        | 0.157                    | 0.025                         |
| 4647        | 215.0                       | Coahuila                        | 5.404                    | 0.107                         |
| 4648        | 217.6                       | Colima                          | 4.064                    | 0.058                         |
| 4649        | 114.5                       | Chiapas                         | -                        | 0.013                         |
| 4650        | 301.2                       | Chihuahua                       | 1.678                    | 0.120                         |
| 4651        | 197.0                       | Mexico City                     | -                        | 0.103                         |
| 4652        | 187.9                       | Durango                         | 0.427                    | 0.110                         |
| 4653        | 142.5                       | Guanajuato                      | 2.284                    | 0.074                         |
| 4654        | 196.6                       | Guerrero                        | 0.008                    | 0.019                         |
| 4655        | 131.4                       | Hidalgo                         | 0.382                    | 0.029                         |
| 4656        | 202.7                       | Jalisco                         | 0.539                    | 0.088                         |
| 4657        | 122.8                       | Estado de México                | 0.903                    | 0.067                         |
| 4658        | 175.5                       | Michoacán de Ocampo             | -                        | 0.066                         |
| 4659        | 154.3                       | Morelos                         | -                        | 0.042                         |
| 4660        | 238.2                       | Nayarit                         | -                        | 0.047                         |
| 4661        | 227.2                       | Nuevo León                      | 1.103                    | 0.094                         |
| 4662        | 128.0                       | Oaxaca                          | 0.002                    | 0.011                         |
| 4663        | 115.3                       | Puebla                          | 0.003                    | 0.033                         |
| 4664        | 117.8                       | Querétaro                       | 0.027                    | 0.086                         |
| 4665        | 116.7                       | Quintana Roo                    | -                        | 0.040                         |
| 4666        | 167.4                       | San Luis Potosí                 | 1.425                    | 0.066                         |
| 4667        | 312.2                       | Sinaloa                         | 0.009                    | 0.058                         |
| 4668        | 304.3                       | Sonora                          | 26.946                   | 0.081                         |
| 4669        | 138.8                       | Tabasco                         | 0.109                    | 0.024                         |
| 4670        | 221.1                       | Tamaulipas                      | 0.329                    | 0.050                         |
| 4671        | 113.1                       | Tlaxcala                        | 0.289                    | 0.030                         |
| 4672        | 157.6                       | Veracruz de Ignacio de la Llave | 1.247                    | 0.046                         |
| 4673        | 141.0                       | Yucatán                         | 0.022                    | 0.029                         |
| 4674        | 199.2                       | Zacatecas                       | 0.201                    | 0.078                         |

Abbreviation: **DALYs**, Disability-Adjusted Life Years.

Data sources: DALYs rate due to malignant respiratory tumors: Global Burden of Disease Study 2019 (GBD 2019) (<https://vizhub.healthdata.org/gbd-results/>). Prevalence of daily smokers: National Survey of Drug, Alcohol and Tobacco Consumption (ENCODAT) 2017

((<https://encuestas.insp.mx/repositorio/encuestas/ENCODAT2016/descargas.php>)). Mean environmental exposure to lead dust (tons/year): Pollutant Emissions and Transfer Register (RETC)

(<http://sinat.semarnat.gob.mx/retc/retc/index.php>).
